# Supplementary material for: Low Baseline Pulmonary Levels of Cytotoxic Lymphocytes as a Predisposing Risk Factor for Severe COVID-19
Source: PubMed Central journal article supplement (PMC7470988; doi:10.1128/msystems.00741-20), 2020-09-01

Figure S4

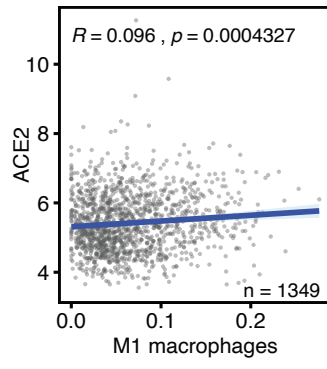

Supplement: mSystems.00741-20-sf004.pdf [file mSystems.00741-20-sf004.pdf]
